# Supplementary material for: Cancer organoid applications to investigate chemotherapy resistance
Source: PubMed Central journal article supplement (PMC9792487; doi:10.3389/fmolb.2022.1067207), 2022-12-13
Supplement: DataSheet1.pdf [file DataSheet1.pdf]

**Supplementary Table S1** List of media ingredients, related to Figure 3.

|                           | Publication            | Year | Basic Medium      | EGF(ng/ml) | B27  | N-acetylcysteine (mM) | A83-01(nM) | Glutamax(mM)    | Noggin (ng/ml) | Y-27632(uM) |    |
|---------------------------|------------------------|------|-------------------|------------|------|-----------------------|------------|-----------------|----------------|-------------|----|
| Gastric Cancer            | Bartfeld et al.        | 2015 | Advanced DMEM/F12 | 50         | 1x   |                       | 1          | 2000            | 2              | 10%CM       | 10 |
|                           | Yan et al.             | 2018 | Advanced DMEM/F12 | 50         | 1x   |                       | 1          | 2000            | 1x             | 10%CM       | 10 |
|                           | Steele et al.          | 2019 | Advanced DMEM/F12 | 50         | 1x   |                       | 1          | -L-Glu.(Thermo) | 1x             | 100         | 10 |
|                           | Lo et al.              | 2021 | Advanced DMEM/F12 | 50         | 1x   |                       | 1          | 500             | 2              | 50%CM       | 10 |
|                           | Togasaki et al.        | 2021 | Advanced DMEM/F12 | 50         | 1x   |                       | 1          | 500             | 2              | 100         | 10 |
| Colorectal Cancer (CRC)   | Sato et al.            | 2011 | Advanced DMEM/F12 | 50         | 1x   |                       | 1          | 500             | 2              | 100         | 10 |
|                           | van de Wetering et al. | 2015 | Advanced DMEM/F12 | 50         | 1x   |                       | 1.25       | 500             | +              | 10%CM       | 10 |
|                           | Engel et al.           | 2020 | Advanced DMEM/F12 | 50         | 1x   |                       | 1.25       | 500             | +              | 10%CM       | 10 |
|                           | Ganesh et al.          | 2020 | Advanced DMEM/F12 | 50         | 1x   |                       | 2          | 500             | 2 (Glutamine)  | 50          | 10 |
|                           | Della Chiara et al.    | 2021 | Advanced DMEM/F12 | 50         | 1x   |                       | 1          | 500             | 2              | 100         | -  |
|                           | Solé et al.            | 2022 | Advanced DMEM/F12 | 50         | 1x   |                       | 1.25       | 500             | -              | 100         | 10 |
|                           | Wang et al.            | 2022 | Advanced DMEM/F12 | 50         | 1x   |                       | -          | 500             | 2              | 100         | 10 |
| Peritoneal Metastases CRC | Narasimhan et al.      | 2020 | Advanced DMEM/F12 | 50         | 2x   |                       | 1          | 500             | 1x             | -           | 10 |
|                           | Laoukili et al.        | 2022 | Advanced DMEM/F12 |            | + 1x |                       | 1.25       | 500             | 0.4            | 0.1         | -  |

  

|     | P/S (U/ml) | Nicotinamide (mM) | HEPES (mM) | R-spondin (ug/ml) | Gastrinl(nM) | Wnt-3a(ng/ml)        | FGF-10 (ng/ml) | SB202190 (uM) | Primocin(ug/uL) | N2 supplement |     |
|-----|------------|-------------------|------------|-------------------|--------------|----------------------|----------------|---------------|-----------------|---------------|-----|
|     | 100        | 10                | 10         | 10%CM             | 1            | 50%CM                | 200            | -             | -               | -             |     |
|     | 1x         | -                 | 1x         | 50%CM             | 1            | 50%CM                | 200            | -             | 1               | -             |     |
|     | 100        | 10                | 10         | CM                | 1            | CM                   | 200            | -             | -               | 1x            |     |
|     | 50         | 10                | 1          | 50%CM             | 10           | 50%CM                | 200            | 10            | -               | -             |     |
|     | 100        | -                 | 10         | 1                 | 10           | 25%CM (Afamin-Wnt3a) | 50             | -             | -               | -             |     |
|     | 100        | 10                | -          | 1                 | 10           | 100                  | -              | 10            | -               | 1x            |     |
| ... | +          | 10                | 10         | 20%               | 10           | -                    | -              | 3             | 100             | -             |     |
|     | -          | 10                | 10         | 20%CM             | 10           | -                    | -              | -             | 100             | -             | ... |
|     | -          | 10                | 10         | 1                 | 10           | 100                  | -              | 10            | 100             | 1x            |     |
|     | +          | 10                | 10         | -                 | 10           | -                    | -              | 10            | -               | 1x            |     |
|     | 100        | 10                | -          | 0.1               | 10           | -                    | -              | 3             | 100             | 1x            |     |
|     | 100        | 4                 | -          | 0.5               | 10           | 100                  | 10             | 5             | +               | -             |     |
|     | -          | -                 | 10         | -                 | 1            | -                    | -              | 5             | -               | -             |     |
|     | 50         | 10                | 10         | 0.1               | 10           | -                    | -              | 10            | -               | -             |     |

  

|     | Gentamicin | Amphotericin B | EDTA(mM) | Dnase(U/ml) | SB431542 (uM) | FGF basic (ng/ml) | PGE2(uM) | Kanamycin | FBS | Normocin(ug/ml) | Antibiotic-Antimycotic |
|-----|------------|----------------|----------|-------------|---------------|-------------------|----------|-----------|-----|-----------------|------------------------|
|     | -          | -              | -        | -           | -             | -                 | -        | -         | -   | -               | -                      |
|     | -          | -              | -        | -           | -             | -                 | -        | -         | -   | -               | -                      |
|     | 1x         | 1x             | -        | -           | -             | -                 | -        | 1x        | -   | -               | -                      |
|     | -          | -              | -        | -           | -             | -                 | -        | -         | 5%  | -               | -                      |
|     | -          | -              | -        | -           | -             | -                 | -        | -         | -   | 100             | -                      |
|     | -          | -              | 2        | 2000        | -             | -                 | -        | -         | -   | -               | -                      |
| ... | -          | -              | -        | -           | -             | 0.01              | -        | -         | -   | -               | -                      |
|     | -          | -              | -        | -           | -             | 1                 | -        | -         | -   | -               | -                      |
|     | -          | -              | -        | -           | -             | -                 | -        | -         | -   | -               | -                      |
|     | -          | -              | -        | -           | -             | 0.01              | -        | -         | -   | -               | -                      |
|     | -          | -              | -        | -           | -             | 10                | -        | -         | -   | -               | -                      |
|     | 10mg/L     | -              | -        | -           | 10            | -                 | -        | -         | -   | -               | 1x                     |
|     | -          | -              | -        | -           | -             | 10                | -        | -         | -   | -               | -                      |
